# Supplementary material for: Effect of protein texturization on amino acids and protein in vitro bioaccessibility of pea and rice protein
Source: Royal Society of Chemistry journal article supplement (doi:10.1039/d4fo04829f), 2025-01-01
Supplement: d4fo04829f1.xlsx [file d4fo04829f1.xlsx]

## Sheet: Extrusion
Protein texturization
2022-12-15
	Time (s)	Speed (1/min)	T1(ºC)	T2(ºC)	T3(ºC)	T4(ºC)	Probe T1(ºC)	Probe T2(ºC)	Pressure(bar)
	0	0	27	86	62	21	37	21	1
	20	0	28	87	63	22	38	22	1
	40	0	28	87	66	26	39	23	0
	60	0	29	88	71	31	40	26	1
	80	0	30	88	77	35	41	30	1
	100	0	30	87	83	39	43	33	0
	120	0	31	86	87	43	45	36	1
	140	0	31	85	92	49	48	41	0
	160	0	31	85	92	49	48	41	0
09:59:34	180	0	32	85	94	54	50	45	0
09:59:54	200	0	33	84	95	58	52	48	0
10:00:14	220	0	33	84	96	62	53	51	-1
10:00:34	240	0	34	83	97	66	54	55	0
10:00:54	260	0	34	82	98	69	56	58	0
10:01:14	280	0	35	82	100	73	57	61	0
10:01:34	300	0	35	81	101	76	59	64	-1
10:01:54	320	0	35	81	102	78	60	67	0
10:02:14	340	0	36	80	102	80	61	69	0
10:02:34	360	0	36	80	103	83	62	71	0
10:02:54	380	0	36	79	103	85	64	74	0
10:03:14	400	0	37	79	104	87	65	76	0
10:03:34	420	0	37	79	104	88	66	78	0
10:03:54	440	0	37	78	104	90	67	80	0
10:04:14	460	0	37	77	105	91	68	81	0
10:04:34	480	0	38	77	105	92	69	83	0
10:04:54	500	0	38	77	105	93	70	85	0
10:05:14	520	0	38	76	105	95	71	86	0
10:05:34	540	0	38	76	105	95	72	88	0
10:05:54	560	0	38	76	105	96	73	89	0
10:06:14	580	0	39	75	105	97	74	90	0
10:06:34	600	0	39	75	105	98	75	91	0
10:06:54	620	0	39	75	105	98	76	93	0
10:07:14	640	0	39	74	105	99	76	94	0
10:07:34	660	0	39	74	105	100	77	95	1
10:07:54	680	0	39	74	105	101	78	95	1
10:08:14	700	0	39	74	105	101	79	96	1
10:08:34	720	0	39	73	105	101	79	97	1
10:08:54	740	0	40	73	105	102	80	98	1
10:09:14	760	0	40	73	105	102	81	99	1
10:09:34	780	0	40	73	105	102	81	99	1
10:09:54	800	0	40	72	105	103	82	100	1
10:10:14	820	0	40	72	105	103	83	101	1
10:10:34	840	0	40	72	104	103	83	101	1
10:10:54	860	0	40	72	104	103	84	102	1
10:11:14	880	0	40	72	104	103	84	102	1
10:11:34	900	0	41	72	104	104	85	103	1
10:11:54	920	0	41	72	104	104	85	103	1
10:12:14	940	0	41	72	104	104	86	103	2
10:12:34	960	0	41	71	104	104	86	104	2
10:12:54	980	0	41	71	104	104	87	104	2
10:13:14	1000	0	41	71	104	104	87	104	2
10:13:34	1020	0	41	71	104	104	88	105	2
10:13:54	1040	0	41	71	104	104	88	105	2
10:14:14	1060	0	41	70	103	104	88	105	2
10:14:34	1080	0	41	70	103	104	89	105	2
10:14:54	1100	0	41	70	103	104	89	106	2
10:15:14	1120	0	41	70	103	104	89	106	2
10:15:34	1140	0	41	70	103	104	90	106	2
10:15:54	1160	0	41	70	103	104	90	106	2
10:16:14	1180	0	41	70	103	104	90	106	2
10:16:34	1200	0	41	69	103	104	91	106	2
10:16:54	1220	0	41	69	103	104	91	106	2
10:17:14	1240	0	41	69	103	104	91	107	2
10:17:34	1260	0	41	69	103	104	91	107	2
10:17:54	1280	0	41	69	103	104	92	107	2
10:18:14	1300	0	41	69	102	104	92	107	2
10:18:34	1320	0	41	69	102	104	92	107	2
10:18:54	1340	0	41	69	102	104	92	107	-1
10:19:14	1360	9	41	69	102	104	93	107	-1
10:19:34	1380	15	41	68	102	103	93	107	-1
10:19:54	1400	25	41	68	102	103	93	107	-1
10:20:14	1420	35	41	68	102	104	93	107	-1
10:20:34	1440	40	41	68	102	103	93	107	0
10:20:54	1460	40	41	68	102	103	93	107	0
10:21:14	1480	40	41	68	102	103	94	107	-1
10:21:34	1500	40	41	67	101	103	94	107	0
10:21:54	1520	40	40	67	101	103	95	107	1
10:22:14	1540	40	40	67	101	103	96	107	14
10:22:34	1560	40	40	66	101	103	96	107	36
10:22:54	1580	40	40	66	101	103	97	107	60
10:23:14	1600	40	40	66	102	103	97	107	67
10:23:34	1620	40	39	65	102	102	97	107	71
10:23:54	1640	40	39	65	102	102	98	107	76
10:24:14	1660	40	39	64	103	102	98	107	76
10:24:34	1680	40	39	64	103	102	98	107	73
10:24:54	1700	45	39	64	103	102	99	107	72
10:25:14	1720	55	38	63	103	102	99	107	76
10:25:34	1740	60	38	63	103	102	100	107	77
10:25:54	1760	70	38	63	103	102	100	107	76
10:26:14	1780	70	38	63	104	102	101	107	75
10:26:34	1800	70	38	63	104	102	101	107	71
10:26:54	1820	75	38	62	104	102	101	107	69
10:27:14	1840	75	37	62	104	102	102	107	68
10:27:34	1860	75	37	62	104	102	102	107	66
10:27:54	1880	80	37	62	104	102	102	107	67
10:28:14	1900	80	37	61	104	102	102	107	66
10:28:34	1920	90	37	61	104	102	103	107	68
10:28:54	1940	95	37	61	104	102	103	108	69
10:29:14	1960	95	37	61	104	102	103	108	68
10:29:34	1980	100	36	60	104	102	104	108	66
10:29:54	2000	100	36	60	104	102	104	108	65
10:30:14	2020	100	36	59	104	102	104	108	65
10:30:34	2040	100	36	59	104	102	104	108	64
10:30:54	2060	100	35	59	104	102	104	108	64
10:31:14	2080	100	35	58	104	102	105	108	64
10:31:34	2100	100	35	58	104	102	105	108	63
10:31:54	2120	100	35	58	105	104	105	109	62
10:32:14	2140	100	35	58	107	106	106	111	61
10:32:34	2160	100	35	57	109	108	106	112	58
10:32:54	2180	100	35	57	111	110	107	113	56
10:33:14	2200	100	35	57	112	112	108	114	54
10:33:34	2220	100	35	57	114	113	109	115	52
10:33:54	2240	100	35	56	114	114	110	116	50
10:34:14	2260	100	35	56	115	115	110	117	48
10:34:34	2280	100	35	56	115	116	111	118	46
10:34:54	2300	100	34	56	116	116	111	119	44
10:35:14	2320	100	35	56	116	117	112	120	43
10:35:34	2340	105	34	55	116	118	112	120	44
10:35:54	2360	110	34	55	117	118	113	121	44
10:36:14	2380	110	34	55	117	119	114	122	43
10:36:34	2400	110	35	55	117	120	114	122	42
10:36:54	2420	110	35	55	118	120	115	123	41
10:37:14	2440	110	34	55	118	120	115	123	41
10:37:34	2460	110	35	55	118	120	116	124	41
10:37:54	2480	110	35	55	118	120	116	124	40
10:38:14	2500	110	36	56	118	121	117	125	41
10:38:34	2520	110	37	56	119	121	117	125	40
10:38:54	2540	110	38	56	119	121	117	125	39
10:39:14	2560	110	38	57	119	121	117	126	38
10:39:34	2580	110	39	57	119	121	118	126	38
10:39:54	2600	110	39	58	119	122	118	126	38
10:40:14	2620	110	39	58	119	122	119	127	39
10:40:34	2640	110	39	58	120	122	119	127	38
10:40:54	2660	110	39	58	120	122	119	127	38
10:41:14	2680	110	39	59	120	122	119	127	37
10:41:34	2700	110	39	59	120	122	120	127	37
10:41:54	2720	110	39	59	120	122	120	128	36
10:42:14	2740	110	39	59	120	122	120	128	37
10:42:34	2760	110	39	60	120	122	120	128	37
10:42:54	2780	110	40	61	120	122	120	128	37
10:43:14	2800	110	40	62	120	122	120	128	37
10:43:34	2820	110	40	63	120	122	121	128	37
10:43:54	2840	110	40	63	120	122	121	128	37
10:44:14	2860	115	40	64	120	122	121	129	37
10:44:34	2880	120	40	65	120	122	121	129	39
10:44:54	2900	120	40	66	120	122	122	129	39
10:45:14	2920	125	40	66	120	122	122	129	39
10:45:34	2940	130	40	68	120	122	122	129	38
10:45:54	2960	130	40	69	120	122	122	129	39
10:46:14	2980	130	41	70	120	122	123	129	39
10:46:34	3000	135	41	71	119	122	123	129	39
10:46:54	3020	140	41	71	118	122	123	129	40
10:47:14	3040	140	41	72	118	122	123	129	40
10:47:34	3060	140	41	72	118	122	123	129	39
10:47:54	3080	140	41	72	119	122	123	130	40
10:48:14	3100	140	41	73	120	122	124	130	39
10:48:34	3120	140	41	73	120	122	124	130	38
10:48:54	3140	140	41	73	120	122	124	130	38
10:49:14	3160	145	41	74	120	122	124	130	39
10:49:34	3180	145	40	74	120	122	124	130	39
10:49:54	3200	145	41	75	120	122	125	130	40
10:50:14	3220	145	41	75	120	122	125	130	40
10:50:34	3240	145	41	75	120	122	125	130	40
10:50:54	3260	145	41	75	120	122	125	130	40
10:51:14	3280	150	41	75	120	122	125	130	40
10:51:34	3300	150	41	75	120	122	125	130	40
10:51:54	3320	150	41	76	120	122	125	130	41
10:52:14	3340	150	42	76	120	122	125	130	40
10:52:34	3360	150	42	76	121	122	125	130	42
10:52:54	3380	150	42	76	121	122	125	130	41
10:53:14	3400	150	42	77	120	122	125	130	35
10:53:34	3420	150	42	77	119	122	125	130	31
10:53:54	3440	150	42	77	118	122	125	130	31
10:54:14	3460	150	42	78	119	122	125	130	31
10:54:34	3480	150	42	78	120	122	124	130	28
10:54:54	3500	150	42	78	121	121	124	129	34
10:55:14	3520	150	42	78	122	121	124	129	33
10:55:34	3540	150	42	78	123	121	124	129	26
10:55:54	3560	150	42	78	123	122	124	129	23
10:56:14	3580	150	42	78	123	121	124	129	18
10:56:34	3600	150	42	78	123	121	124	129	25
10:56:54	3620	150	42	78	122	121	124	129	15
10:57:14	3640	150	42	79	122	121	124	129	17
10:57:34	3660	150	42	79	123	121	124	129	16
10:57:54	3680	150	43	82	124	121	124	129	19
10:58:14	3700	150	43	83	124	121	124	129	19
10:58:34	3720	150	43	85	124	121	124	129	14
10:58:54	3740	150	46	86	124	122	124	129	12
10:59:14	3760	150	49	87	123	123	124	129	22
10:59:34	3780	150	53	87	123	123	124	129	17
10:59:54	3800	150	55	88	122	124	124	129	20
11:00:14	3820	150	58	89	122	124	124	128	22
11:00:34	3840	150	60	90	123	123	124	128	27
11:00:54	3860	150	63	91	123	123	124	127	20
11:01:14	3880	150	65	92	123	123	123	127	10
11:01:34	3900	150	66	92	122	122	123	127	17
11:01:54	3920	150	68	93	122	122	123	126	14
11:02:14	3940	150	68	93	122	122	122	126	12
11:02:34	3960	150	68	93	122	122	122	126	11
11:02:54	3980	150	69	93	121	122	122	125	14
11:03:14	4000	150	70	93	121	121	122	125	9
11:03:34	4020	150	71	94	121	121	121	125	14
11:03:54	4040	150	72	94	121	121	121	125	10
11:04:14	4060	150	72	95	121	121	121	125	12
11:04:34	4080	150	72	95	122	121	121	125	13
11:04:54	4100	150	73	95	122	121	121	124	15
11:05:14	4120	150	75	96	122	121	121	124	17
11:05:34	4140	150	76	96	122	120	121	124	23
11:05:54	4160	150	76	97	122	120	121	124	25
11:06:14	4180	150	77	98	122	120	121	124	17
11:06:34	4200	150	78	98	122	120	122	124	29
11:06:54	4220	150	79	99	122	120	122	124	29
11:07:14	4240	150	79	100	122	120	122	124	32
11:07:34	4260	150	80	100	122	120	122	124	29
11:07:54	4280	150	80	101	122	120	122	124	30
11:08:14	4300	150	81	101	122	120	122	124	30
11:08:34	4320	150	81	102	122	120	122	124	26
11:08:54	4340	150	81	103	122	120	121	124	33
11:09:14	4360	150	82	103	122	120	121	124	59
11:09:34	4380	150	81	103	122	120	122	124	58
11:09:54	4400	150	79	102	122	120	122	124	42
11:10:14	4420	150	78	102	121	120	123	124	47
11:10:34	4440	150	76	101	121	120	123	124	44
11:10:54	4460	150	75	101	120	120	123	124	43
11:11:14	4480	150	74	100	120	120	123	124	43
11:11:34	4500	150	72	100	119	120	123	124	44
11:11:54	4520	150	72	100	119	120	123	124	42
11:12:14	4540	150	71	99	119	120	123	124	43
11:12:34	4560	150	70	99	119	120	123	124	44
11:12:54	4580	150	69	99	119	120	124	124	44
11:13:14	4600	150	67	99	119	120	123	124	44
11:13:34	4620	150	66	99	119	120	124	124	45
11:13:54	4640	150	66	99	119	120	124	124	46
11:14:14	4660	150	65	98	120	120	124	124	46
11:14:34	4680	150	64	98	120	120	124	124	47
11:14:54	4700	150	63	98	120	120	124	124	47
11:15:14	4720	150	63	98	119	120	124	124	46
11:15:34	4740	150	62	98	119	120	124	124	48
11:15:54	4760	150	61	97	119	120	124	124	48
11:16:14	4780	150	60	97	119	120	124	124	47
11:16:34	4800	150	60	97	119	120	124	124	48
11:16:54	4820	150	59	96	119	120	124	124	46
11:17:14	4840	150	58	95	119	120	124	124	48
11:17:34	4860	150	57	94	119	120	124	124	48
11:17:54	4880	150	57	92	119	120	124	124	48
11:18:14	4900	150	56	91	119	120	124	124	47
11:18:34	4920	150	56	90	119	120	124	124	47
11:18:54	4940	150	55	90	119	120	124	124	48
11:19:14	4960	150	55	89	119	120	124	124	49
11:19:34	4980	150	54	88	120	120	124	124	48
11:19:54	5000	150	54	87	120	120	124	124	48
11:20:14	5020	150	53	86	120	120	124	124	49
11:20:34	5040	150	53	85	119	120	124	124	48
11:20:54	5060	150	52	84	119	120	124	124	48
11:21:14	5080	150	52	83	119	120	124	124	47
11:21:34	5100	150	51	83	119	120	124	124	48
11:21:54	5120	150	51	82	119	120	124	124	48
11:22:14	5140	150	51	81	119	120	124	124	47
11:22:34	5160	150	50	81	120	120	124	124	47
11:22:54	5180	150	50	80	119	120	124	124	48
11:23:14	5200	150	49	79	119	120	124	124	48
11:23:34	5220	150	49	79	119	120	124	124	49
11:23:54	5240	150	49	78	119	120	124	124	41
11:24:14	5260	150	48	78	119	120	124	124	39
11:24:34	5280	150	48	77	121	120	124	124	39
11:24:54	5300	150	48	77	122	120	125	124	46
11:25:14	5320	150	48	76	123	120	125	124	52
11:25:34	5340	150	48	76	123	120	125	124	37
11:25:54	5360	150	48	75	123	120	125	124	30
11:26:14	5380	150	47	75	123	120	125	124	29
11:26:34	5400	150	47	75	123	120	125	124	34
11:26:54	5420	150	47	74	122	120	124	124	33
11:27:14	5440	150	47	74	122	120	124	124	32
11:27:34	5460	150	46	74	122	120	124	124	30
11:27:54	5480	150	46	74	122	120	124	124	34
11:28:14	5500	150	46	73	122	120	124	124	29
11:28:34	5520	150	46	73	122	120	124	124	32
11:28:54	5540	150	46	73	122	120	124	124	30
11:29:14	5560	150	46	72	122	120	124	124	31
11:29:34	5580	150	46	72	122	120	124	124	36
11:29:54	5600	150	46	72	121	120	124	124	39
11:30:14	5620	150	46	72	121	120	123	124	33
11:30:34	5640	150	46	72	121	120	124	124	37
11:30:54	5660	150	46	71	121	120	124	124	42
11:31:14	5680	150	45	71	121	120	123	124	40
11:31:34	5700	150	45	71	121	120	123	124	40
11:31:54	5720	150	45	71	121	120	123	124	40
11:32:14	5740	150	45	71	121	120	123	124	41
11:32:34	5760	150	45	70	121	120	123	124	46
11:32:54	5780	150	45	70	121	120	123	124	47
11:33:14	5800	150	45	70	121	120	123	124	38
11:33:34	5820	150	45	70	121	120	123	124	42
11:33:54	5840	150	45	70	121	120	123	124	42
11:34:14	5860	150	45	70	121	120	123	124	43
11:34:34	5880	150	45	70	121	120	123	124	45
11:34:54	5900	150	45	71	121	120	123	124	45
11:35:14	5920	150	44	72	121	120	123	124	43
11:35:34	5940	150	45	73	122	120	123	124	45
11:35:54	5960	150	44	75	122	120	123	124	49
11:36:14	5980	150	44	74	122	120	123	124	46
11:36:34	6000	150	44	76	121	120	123	124	39
11:36:54	6020	150	44	77	121	120	123	124	47
11:37:14	6040	150	44	78	121	120	123	124	47
11:37:34	6060	150	44	79	121	120	123	124	45
11:37:54	6080	150	45	79	121	120	123	124	48
11:38:14	6100	150	45	78	121	120	123	124	48
11:38:34	6120	150	45	77	120	120	123	124	52
11:38:54	6140	150	45	77	120	120	123	124	55
11:39:14	6160	150	45	76	120	120	123	124	56
11:39:34	6180	150	45	76	119	120	123	124	58
11:39:54	6200	150	45	75	117	120	123	124	57
11:40:14	6220	150	45	74	115	120	123	124	67
11:40:34	6240	150	46	74	115	120	123	124	55
11:40:54	6260	150	45	73	115	120	123	124	59
11:41:14	6280	150	46	73	117	120	123	124	52
11:41:34	6300	150	46	72	118	120	123	124	59
11:41:54	6320	150	46	72	118	120	123	124	57
11:42:14	6340	150	46	72	118	120	123	124	55
11:42:34	6360	150	45	72	117	120	124	124	60
11:42:54	6380	150	45	71	117	120	124	124	55
11:43:14	6400	150	45	71	117	120	124	124	56
11:43:34	6420	150	45	71	117	120	124	124	53
11:43:54	6440	150	45	70	117	120	124	124	55
11:44:14	6460	150	45	70	118	120	124	124	54
11:44:34	6480	150	45	70	118	120	124	124	54
11:44:54	6500	150	45	70	118	120	124	124	55
11:45:14	6520	150	46	70	118	120	124	124	54
11:45:34	6540	150	46	69	117	120	124	124	56
11:45:54	6560	150	46	69	117	120	124	124	55
11:46:14	6580	150	46	69	117	120	124	124	55
11:46:34	6600	150	46	69	117	120	124	124	57
11:46:54	6620	150	46	68	117	120	124	124	55
11:47:14	6640	150	47	68	117	120	124	124	57
11:47:34	6660	150	47	68	117	120	124	124	57
11:47:54	6680	150	47	68	118	120	124	124	56
11:48:14	6700	150	47	68	118	120	124	124	56
11:48:34	6720	150	48	68	118	120	124	124	58
11:48:54	6740	150	48	68	118	120	124	124	58
11:49:14	6760	150	48	68	118	120	124	124	59
11:49:34	6780	150	48	68	118	120	124	124	57
11:49:54	6800	150	48	68	118	120	125	124	61
11:50:14	6820	150	48	67	118	120	125	124	62
11:50:34	6840	150	49	67	118	120	125	124	61
11:50:54	6860	150	49	67	118	120	125	124	59
11:51:14	6880	150	49	67	118	120	125	124	60
11:51:34	6900	150	49	67	118	120	125	124	60
11:51:54	6920	150	49	67	118	120	125	124	58
11:52:14	6940	150	49	67	119	120	126	124	61
11:52:34	6960	150	49	66	121	120	126	125	52
11:52:54	6980	150	49	66	122	120	126	125	63
11:53:14	7000	150	49	66	123	120	126	125	62
11:53:34	7020	150	48	66	123	120	126	125	55
11:53:54	7040	150	48	66	123	120	126	124	52
11:54:14	7060	150	48	66	123	120	126	125	51
11:54:34	7080	150	48	66	122	120	126	125	49
11:54:54	7100	150	48	66	122	120	126	125	49
11:55:14	7120	150	48	66	122	120	126	125	49
11:55:34	7140	150	48	65	121	120	125	124	48
11:55:54	7160	150	48	65	121	120	125	124	48
11:56:14	7180	150	48	65	121	120	125	124	51
11:56:34	7200	150	48	65	121	120	125	124	49
11:56:54	7220	150	48	65	120	120	125	124	49
11:57:14	7240	150	48	65	120	120	125	124	49
11:57:34	7260	150	48	64	120	120	125	124	49
11:57:54	7280	150	48	64	120	120	125	124	49
11:58:14	7300	150	48	64	120	120	124	124	50
11:58:34	7320	150	47	64	120	120	124	125	50
11:58:54	7340	150	47	64	120	120	124	125	49
11:59:14	7360	150	47	63	120	120	124	125	50
11:59:34	7380	150	47	63	120	120	124	125	49
11:59:54	7400	150	47	63	120	120	124	125	51
12:00:14	7420	150	47	63	120	120	124	124	49
12:00:34	7440	150	47	64	120	120	124	124	49
12:00:54	7460	150	47	64	120	120	124	124	52
12:01:14	7480	150	47	65	120	120	124	124	49
12:01:34	7500	150	47	65	120	120	124	124	51
12:01:54	7520	150	47	65	120	120	124	124	48
12:02:14	7540	150	47	65	120	120	124	124	51
12:02:34	7560	150	47	65	120	120	124	124	51
12:02:54	7580	150	47	66	120	120	124	124	49
12:03:14	7600	150	47	66	120	120	124	124	50
12:03:34	7620	150	47	67	120	120	124	124	49
12:03:54	7640	150	46	67	120	120	124	124	50
12:04:14	7660	150	46	68	120	120	124	124	54
12:04:34	7680	150	46	68	120	120	124	124	52
12:04:54	7700	150	46	69	119	120	124	124	51
12:05:14	7720	150	46	69	118	120	124	124	50
12:05:34	7740	150	46	69	118	120	124	124	51
12:05:54	7760	150	46	70	118	120	124	124	50
12:06:14	7780	150	46	70	117	120	124	124	44
12:06:34	7800	150	46	71	118	120	125	124	48
12:06:54	7820	150	46	71	118	120	124	124	44
12:07:14	7840	150	47	72	118	120	124	124	45
12:07:34	7860	150	47	72	118	120	124	124	44
12:07:54	7880	150	47	73	118	120	124	124	43
12:08:14	7900	150	47	73	118	120	124	124	44
12:08:34	7920	150	47	74	119	120	124	124	45
12:08:54	7940	150	47	74	119	120	124	124	44
12:09:14	7960	150	47	74	119	120	124	124	43
12:09:34	7980	150	48	75	119	120	124	124	43
12:09:54	8000	150	48	75	119	120	124	124	43
12:10:14	8020	150	48	75	119	120	124	124	43
12:10:34	8040	150	48	76	119	120	124	124	43
12:10:54	8060	150	48	76	119	120	124	124	42
12:11:14	8080	150	48	76	119	120	124	124	42
12:11:34	8100	150	48	76	119	120	124	124	42
12:11:54	8120	150	48	77	119	120	124	124	42
12:12:14	8140	150	48	77	120	120	124	124	42
12:12:34	8160	150	48	77	120	120	124	124	42
12:12:54	8180	150	48	77	120	120	124	124	42
12:13:14	8200	150	48	78	120	120	124	124	42
12:13:34	8220	150	48	78	120	120	124	124	41
12:13:54	8240	150	48	78	120	120	124	124	42
12:14:14	8260	150	48	79	120	120	124	124	42
12:14:34	8280	150	48	79	120	120	124	124	42
12:14:54	8300	150	48	79	120	120	124	124	42
12:15:14	8320	150	48	79	120	120	124	124	42
12:15:34	8340	150	48	79	120	120	124	124	42
12:15:54	8360	150	48	80	120	120	124	124	42
12:16:14	8380	150	48	80	120	120	124	124	41
12:16:34	8400	150	48	80	120	120	124	124	42
12:16:54	8420	150	48	80	120	120	124	124	42
12:17:14	8440	150	48	80	120	120	124	124	42
12:17:34	8460	150	48	80	120	120	124	124	42
12:17:54	8480	150	48	80	120	120	124	124	41
12:18:14	8500	150	48	81	120	120	124	124	42
12:18:34	8520	150	47	81	120	120	124	124	41
12:18:54	8540	150	47	81	120	120	124	124	41
12:19:14	8560	150	47	81	120	120	124	124	36
12:19:34	8580	150	47	82	121	120	125	124	30
12:19:54	8600	150	47	83	121	120	125	124	30
12:20:14	8620	150	47	84	122	120	126	124	25
12:20:34	8640	150	47	84	122	120	127	124	30
12:20:54	8660	150	47	86	122	120	127	124	57
12:21:14	8680	150	47	88	122	120	128	124	65
12:21:34	8700	150	47	89	122	120	130	124	80
12:21:54	8720	150	47	90	123	120	130	124	95
12:22:14	8740	150	47	90	124	120	131	124	141
12:22:34	8760	150	47	91	125	120	132	124	144
12:22:54	8780	150	47	91	127	120	133	124	181
12:23:14	8800	150	47	89	129	120	134	124	220
12:23:34	8820	150	47	88	129	120	133	125	105
12:23:54	8840	150	47	88	129	120	132	125	64
12:24:14	8860	150	47	87	129	120	131	125	78
12:24:34	8880	150	46	86	129	120	130	125	70
12:24:54	8900	150	46	86	128	120	130	124	66
12:25:14	8920	150	46	85	127	120	130	124	63
12:25:34	8940	150	46	85	125	120	129	124	61
12:25:54	8960	150	46	84	124	120	129	124	60
12:26:14	8980	150	46	84	123	120	128	124	60
12:26:34	9000	150	46	83	122	120	128	124	57
12:26:54	9020	150	46	83	122	120	127	124	60
12:27:14	9040	150	46	82	121	120	127	124	61
12:27:34	9060	150	46	82	121	120	127	124	58
12:27:54	9080	150	45	81	121	120	126	124	60
12:28:14	9100	150	45	81	121	120	126	124	64
12:28:34	9120	150	45	81	121	120	126	124	66
12:28:54	9140	145	45	81	120	120	126	124	62
12:29:14	9160	145	45	81	120	120	125	124	68
12:29:34	9180	145	45	81	120	120	125	125	77
12:29:54	9200	135	44	81	120	120	125	125	73
12:30:14	9220	135	44	81	120	120	125	124	75
12:30:34	9240	135	44	81	120	120	125	124	66
12:30:54	9260	135	44	80	120	119	124	124	52
12:31:14	9280	135	44	80	119	119	124	124	51
12:31:34	9300	135	44	79	118	119	124	123	53
12:31:54	9320	135	44	79	117	118	123	123	59
12:32:14	9340	135	44	78	117	118	123	123	61
12:32:34	9360	130	44	77	116	118	123	122	54
12:32:54	9380	125	44	76	116	117	122	122	50
12:33:14	9400	120	43	75	115	116	122	122	50
12:33:34	9420	115	43	75	114	116	121	121	49
12:33:54	9440	110	43	74	114	116	121	121	49
12:34:14	9460	105	43	73	113	115	120	120	48
12:34:34	9480	100	43	73	112	115	120	120	51
12:34:54	9500	100	43	72	112	114	119	120	52
12:35:14	9520	95	43	72	111	114	119	119	51
12:35:34	9540	90	43	71	110	114	118	119	50
12:35:54	9560	85	42	71	110	113	118	118	49
12:36:14	9580	80	42	70	109	113	117	118	50
12:36:34	9600	80	42	70	109	112	117	118	52
12:36:54	9620	75	42	69	108	112	116	117	54
12:37:14	9640	70	42	69	108	112	116	117	54
12:37:34	9660	65	42	69	107	111	115	116	54
12:37:54	9680	60	42	68	107	111	114	116	54
12:38:14	9700	55	42	68	107	111	114	115	54
12:38:34	9720	50	42	68	106	110	113	115	49
12:38:54	9740	40	42	68	106	110	113	115	45
12:39:14	9760	40	41	67	105	109	112	114	46
12:39:34	9780	30	41	67	105	109	112	114	45
12:39:54	9800	30	41	67	104	109	111	113	44
12:40:14	9820	30	41	67	104	108	110	113	41
12:40:34	9840	30	41	66	103	108	110	113	43
12:40:54	9860	30	41	67	103	107	109	112	57
12:41:14	9880	30	41	67	102	107	109	112	61
12:41:34	9900	30	41	67	102	107	108	111	53
12:41:54	9920	30	41	67	102	106	108	111	45
12:42:14	9940	30	41	67	101	106	107	110	41
12:42:34	9960	30	41	67	101	105	107	110	39
12:42:54	9980	30	41	67	101	105	106	110	37
12:43:14	10000	30	41	67	100	105	106	109	36
12:43:34	10020	30	42	67	99	105	105	109	35
12:43:54	10040	30	42	67	99	104	105	108	34
12:44:14	10060	30	42	67	98	104	105	108	33
12:44:34	10080	30	42	66	98	103	104	108	32
12:44:54	10100	30	42	66	97	103	104	107	31
12:45:14	10120	30	42	66	97	103	103	107	30
12:45:34	10140	30	42	66	97	102	103	106	30
12:45:54	10160	30	42	66	96	102	102	106	29
12:46:14	10180	0	42	66	96	101	102	-3	22
12:46:34	10200	0	42	66	95	101	-302	-329	8
12:46:54	10220	0	42	66	95	90	-437	-437	1
12:47:14	10240	0	42	66	94	68	-437	-437	-1
12:47:34	10260	0	42	66	94	54	-437	-437	-1
12:47:54	10280	0	42	66	93	46	-437	-437	0
12:48:14	10300	0	42	66	93	41	-437	-437	0
12:48:34	10320	0	42	65	92	37	-437	-437	0
12:48:54	10340	0	42	65	92	35	-437	-437	0
12:49:14	10360	0	42	65	91	33	-437	-437	0
12:49:34	10380	0	42	65	91	31	-437	-437	0
12:49:54	10400	0	42	65	91	30	-437	-437	0
12:50:14	10420	0	42	64	91	29	-437	-437	0
12:50:34	10440	0	42	64	91	28	-437	-437	0
12:50:54	10460	0	42	64	91	27	-437	-437	0
12:51:14	10480	0	42	63	92	26	-437	-437	0
12:51:34	10500	0	42	63	92	26	-437	-437	0
12:51:54	10520	0	42	63	92	25	-437	-437	0
12:52:14	10540	0	42	63	92	25	-437	-437	0
12:52:34	10560	0	42	63	92	24	-437	-437	0
12:52:54	10580	0	42	63	92	24	-437	-437	0
12:53:14	10600	0	42	63	92	24	-437	-437	0
12:53:34	10620	0	42	63	92	24	-437	-437	0
12:53:54	10640	0	42	63	93	800	-437	-437	0
12:54:14	10660	0	42	63	93	800	-437	-437	0
12:54:34	10680	0	42	63	93	800	-437	-437	0
12:54:54	10700	0	42	63	94	800	-437	-437	0
12:55:14	10720	0	41	63	94	800	-437	-437	0
12:55:34	10740	0	41	63	94	800	-437	-437	0
12:55:54	10760	0	41	63	94	800	-437	-437	0
12:56:14	10780	0	41	63	94	800	-437	-437	0
12:56:34	10800	0	41	63	94	800	-437	-437	0
12:56:54	10820	0	41	62	94	800	-437	-437	0
12:57:14	10840	0	41	62	94	800	-437	-437	0
12:57:34	10860	0	41	62	95	800	-437	-437	0
12:57:54	10880	0	41	62	95	800	-437	-437	0
12:58:14	10900	0	41	62	95	800	-437	-437	0
12:58:34	10920	0	41	62	95	800	-437	-437	0
12:58:54	10940	0	41	62	95	800	-437	-437	0
12:59:14	10960	0	41	62	95	800	-437	-437	0
12:59:34	10980	0	41	62	96	800	-437	-437	0
12:59:54	11000	0	41	62	96	800	-437	-437	0
13:00:14	11020	0	41	62	96	800	-437	-437	0
13:00:34	11040	0	41	62	96	800	-437	-437	0
13:00:54	11060	0	41	62	96	800	-437	-437	0
13:01:14	11080	0	41	62	96	800	-437	-437	0
13:01:34	11100	0	41	62	96	800	-437	-437	0
13:01:54	11120	0	41	62	96	800	-437	-437	0
13:02:14	11140	0	41	62	96	800	-437	-437	0
13:02:34	11160	0	41	62	97	800	-437	-437	0
13:02:54	11180	0	41	62	97	800	-437	-437	0
13:03:14	11200	0	41	62	97	800	-437	-437	0
13:03:34	11220	0	41	62	97	800	-437	-437	0
13:03:54	11240	0	41	62	97	800	-437	-437	0
13:04:14	11260	0	41	62	97	800	-437	-437	0
13:04:34	11280	0	41	62	97	800	-437	-437	0
13:04:54	11300	0	41	62	97	800	-437	-437	0
13:05:14	11320	0	41	62	97	800	-437	-437	0
13:05:34	11340	0	41	62	97	800	-437	-437	0
13:05:54	11360	0	41	62	97	800	-437	-437	0
13:06:14	11380	0	41	62	97	800	-437	-437	0
13:06:34	11400	0	41	62	97	800	-437	-437	0
13:06:54	11420	0	41	62	97	800	-437	-437	0
13:07:14	11440	0	41	62	97	800	-437	-437	0
13:07:34	11460	0	41	62	97	800	-437	-437	0
13:07:54	11480	0	41	62	97	800	-437	-437	0
13:08:14	11500	0	41	62	97	800	-437	-437	0
13:08:34	11520	0	41	62	97	800	-437	-437	0
13:08:54	11540	0	41	62	97	800	-437	-437	0
13:09:14	11560	0	41	62	97	800	-437	-437	0
13:09:34	11580	0	41	62	97	800	-437	-437	0
13:09:54	11600	0	41	62	97	800	-437	-437	0
13:10:14	11620	0	41	62	97	800	-437	-437	0
13:10:34	11640	0	41	62	97	800	-437	-437	0
13:10:54	11660	0	41	62	97	800	-437	-437	0
13:11:14	11680	0	41	62	97	800	-437	-437	0
13:11:34	11700	0	41	62	97	800	-437	-437	0
13:11:54	11720	0	41	62	97	800	-437	-437	0
13:12:14	11740	0	41	62	97	800	-437	-437	0

## Sheet: Protein
Muestra	Muestra Real Digestion	%Proteina Bruta (PB)		Muestra DIGERIDA	%PB	agua
PAGA	PAA	72.6801		PAGA.D	48.8901	8.3	40.5901
PAGA	PAA	73.9903		PAGA.D	45.8251	8.3	37.5251
PAA	PAGA	76.6971		PAS.D	42.3951	8.3	34.0951
PAA	PAGA	75.3878		PAS.D	43.2696	8.3	34.9696
PGA	PGA	75.2788		PGAS.D	51.9732	8.3	43.6732
PGA	PGA	75.4902		PGAS.D	49.4002	8.3	41.1002
PAGT	PAGT	68.5233		PAGT.D	44.742	8.3	36.442
PAGT	PAGT	69.755		PAGT.D	42.3828	8.3	34.0828
PAT	PAT	65.1091		PAT.D	43.3723	8.3	35.0723
PAT	PAT	65.1		PAT.D	42.63	8.3	34.33
PGT	PGT	70.0485		PGT.D	51.1108	8.3	42.8108
PGT	PGT	73.3154		PGT.D	45.5	8.3	37.2
Media Agua disgesto		8.29673

## Sheet: AA
RÉPLICA	CÓDIGO EMPRESA	CÓDIGO INTERNO	Aspartico (%)	Glutamico (%)	Asparagina (%)	Serina (%)	Glutamina (%)	Histidina (%)	Glycine (%)	Treonina (%)	Arginina (%)	Alanina (%)	Tyrosina (%)	Valina (%)	Cystina (%)	Metionina (%)	Tryptofano (%)	Phenylalanine (%)	Isoleucine (%)	Leucine (%)	Lysina (%)	Prolina (%)	EAA	NEAA
1	PAAa	MR23_237	5.91501	15.06	0.05	4.3283	0.05	1.81972	2.76409	3.08272	7.02583	4.61767	4.33963	5.57068	1.29624	2.40925	0.484134	4.5648	3.27958	7.65248	0.942402	0.170807	36.5183	38.9759
1	PATa	MR23_238	5.19261	13.1769	0.05	3.7421	0.05	1.52611	2.4282	2.66893	6.10697	3.97309	3.63193	4.96576	1.07048	2.04373	0.126431	3.98452	2.94209	6.63914	1.46166	0.273363	32.6123	33.6151
1	PGAa	MR23_239	8.14526	14.4042	0.05	4.45095	0.05	1.95065	2.73506	3.19203	7.48387	3.57056	3.12057	4.94358	0.545033	0.970784	0.13147	4.78101	3.99539	7.69805	2.92419	0.284468	38.224	37.3876
1	PGTa	MR23_240	7.971	14.1614	0.05	4.31574	0.05	1.85932	2.67943	3.12478	7.2427	3.52286	2.93886	4.68828	0.517618	0.970281	0.11009	4.61371	3.83645	7.5474	2.76089	0.316525	36.9603	36.5335
1	PAGAa	MR23_241	8.5314	13.8852	0.05	4.29055	0.05	1.88035	2.6365	2.78768	7.21418	3.44189	3.00812	4.66431	0.525392	0.935801	0.126732	4.60872	3.85141	7.42064	2.81882	0.18666	36.3686	36.6324
1	PAGTa	MR23_242	7.14741	14.876	0.05	4.45442	0.05	1.89571	2.78927	3.13868	7.21064	4.06295	3.43262	5.14142	0.85326	1.3672	0.0664939	4.62752	3.56647	7.71148	2.5937	0.256277	37.5091	37.9387
1	PAAd	MR23_243	4.36129	8.85275	0.05	2.57044	0.05	1.07354	2.80013	1.72636	4.61816	2.22178	1.91623	2.63824	0.341797	0.629628	0.114262	2.47732	1.91847	3.92563	1.20223	0.189241	20.3988	23.3679
1	PATd	MR23_244	4.43106	9.57037	0.05	2.90554	0.05	1.17163	3.75077	1.98876	5.48596	3.01176	2.61901	3.55485	0.506692	0.934558	0.136159	2.86315	2.11569	4.39356	1.34853	0.221208	24.0779	27.1526
1	PGAd	MR23_245	6.60986	13.136	0.05	3.53783	0.05	1.47354	3.54833	2.34857	6.31342	2.74779	2.29159	3.40636	0.290443	0.493157	0.107738	3.38288	2.79146	5.56734	3.09021	0.431625	29.2986	32.7011
1	PGTd	MR23_246	5.96808	12.0172	0.05	3.20595	0.05	1.3237	3.40227	2.12203	5.82305	2.52539	2.09965	3.09685	0.290692	0.617074	0.110426	3.08486	2.5504	4.96381	1.80454	0.233707	25.62	29.8534
1	PAGAd	MR23_247	3.78719	7.98877	0.05	2.47869	0.05	1.03477	3.26392	1.73417	4.72381	2.61144	2.30747	3.05104	0.481506	0.795472	0.136232	2.45112	1.77459	3.78715	0.540862	0.05	19.943	23.1052
1	PAGTd	MR23_248	4.89033	9.91135	0.05	2.79481	0.05	1.16369	3.08571	1.89578	5.12762	2.44844	2.11175	2.96453	0.34547	0.628993	0.116071	2.71103	2.12511	4.29866	0.05	0.197244	21.1627	25.9012
1	AGUAd	MR23_249	0.848191	1.05343	0.05	0.445282	0.05	0.341578	4.45347	0.389924	0.704321	0.612678	1.04756	0.745632	0.18521	0.179177	0.05	0.423991	0.372992	0.579278	0.146533	0.0651484	3.94858	8.76097
2	PAAa	MR23_237	6.68001	11.26	0.05	4.0717	0.05	2.53028	3.28591	3.81728	8.82583	2.63233	4.81037	4.47932	1.89624	1.92476	0.841337	4.5352	2.92042	6.75248	1.4076	0.647919	37.8411	36.1258
2	PATa	MR23_238	5.23523	9.37687	0.05	2.6579	0.05	1.82389	2.16218	3.23107	6.90697	2.87691	3.51807	5.08424	0.970483	2.00162	0.564309	3.41548	2.25791	6.73914	1.88834	0.637664	33.9863	27.9996
2	PGAa	MR23_239	11.1405	9.60425	0.05	3.94905	0.05	2.39935	2.31494	3.60797	7.28387	3.37944	4.02943	5.10642	0.445033	0.99	0.314695	4.31899	3.20461	6.79805	3.42581	0.365532	37.5006	35.5429
2	PGTa	MR23_240	10.792	9.36137	0.05	4.08426	0.05	1.49068	2.37057	3.77522	8.0427	3.32714	3.21114	2.36172	0.817618	0.702807	0.0897474	4.58629	3.36355	6.6474	3.08911	0.333475	34.393	34.3873
2	PAGAa	MR23_241	11.9128	8.08518	0.05	3.10945	0.05	1.46965	2.4135	3.11232	3.01418	4.40811	4.14188	2.38569	0.57	1.35801	0.267319	3.49128	3.34859	7.52064	3.03118	0.633402	29.3649	35.5416
2	PAGTa	MR23_242	9.14481	10.076	0.05	2.94558	0.05	1.45429	3.26073	3.56132	5.01064	2.68705	3.71738	2.90858	1.02326	1.67203	0.126649	4.27248	2.63353	3.81148	2.7563	0.226562	28.3072	33.208
2	PAAd	MR23_243	5.15	6.05275	0.05	3.72956	0.05	2.27646	2.24987	2.17364	6.58184	4.62822	2.23377	4.41176	0.241797	0.962771	0.426239	2.82268	2.28153	3.97437	1.14777	0.607594	27.2404	25.3198
2	PATd	MR23_244	5.15	7.77037	0.05	3.39446	0.05	2.17837	3.29923	1.91124	4.28596	3.83824	2.53099	3.59515	0.606692	1.13456	0.36159	2.23685	2.18431	4.50644	2.00147	0.428792	24.4631	27.3804
2	PGAd	MR23_245	8.06971	8.33595	0.05	2.86217	0.05	1.87646	3.50167	2.55143	6.11342	2.10221	2.85841	3.64364	0.404427	0.793157	0.237738	3.71712	3.40854	5.63266	3.25979	0.218375	31.2146	28.5907
2	PGTd	MR23_246	6.78616	11.2172	0.05	3.99405	0.05	1.0263	3.74773	2.77797	5.62305	2.42461	2.05035	3.85315	0.356918	0.707363	0.142595	3.01514	2.6496	4.93619	1.54546	0.16293	26.2972	30.8826
2	PAGAd	MR23_247	5.15	7.21	0.05	3.92131	0.05	1.31523	3.78608	2.16583	4.47619	3.23856	2.84253	3.99896	0.881506	0.954716	0.323153	4.64888	1.42541	3.11285	0.580914	0.05	22.729	27.4031
2	PAGTd	MR23_248	5.15	9.11135	0.05	3.80519	0.05	1.18631	3.96429	2.00422	6.07238	2.40156	3.03825	3.08547	0.547026	0.899258	0.16	3.38897	2.07489	4.60134	0.05	0.645276	24.0081	28.823
2	AGUAd	MR23_249	1.14	1.75	0.05	0.954718	0.05	0.600842	3.59653	0.651008	0.449568	0.623732	1.10244	0.630437	0.252101	0.479177	0.05	0.676009	0.827008	0.532072	0.620347	0.0658485	5.53232	9.53537
